# Supplementary material for: Optimal Laboratory Cultivation Conditions of Limnospira maxima for Large-Scale Production
Source: MDPI journal article supplement (doi:10.3390/biology12121462), 2023-11-24
Supplement: s1 [file s1]

**Supplementary Table S7.** Effect of light spectra and nitrogen source on phycoerythrin concentration of *Limnospira maxima* grown in white, red, blue, and yellow light spectra, supplemented with NaNO<sub>3</sub>, KNO<sub>3</sub>, plus control (WN). Values followed by capital letter denote significant effect between N source in the same light spectra and small letter denote significance between light spectra in the same nitrogen source. All value represents media ( $\pm$  SD), followed by SNK statistical test.

| Light spectra | N source          | 0        | 3         | 6        | 9        | 12       | 15       | 18       | 21       | 24       | 27       |
|---------------|-------------------|----------|-----------|----------|----------|----------|----------|----------|----------|----------|----------|
| White         | NaNO <sub>3</sub> | 17.38 Ac | 28.83 Ab  | 35.71 Ab | 39.89 Bb | 50.96 Ab | 55.59 Ab | 64.85 Aa | 64.72 Ab | 78.98 Ab | 80.60 Ab |
|               | KNO <sub>3</sub>  | 9.81 Cc  | 17.98 Bc  | 24.28 Bc | 28.14 Cc | 33.86 Cb | 37.11 Cc | 43.00 Cc | 49.14 Cc | 50.35 Bb | 56.60 Bb |
|               | WN                | 12.94 Bc | 27.12 Ab  | 36.29 Ab | 42.49 Ab | 49.48 Ba | 51.11 Ba | 60.87 Ba | 57.03 Ba | 53.42 Bb | 49.64 Cc |
| Red           | NaNO <sub>3</sub> | 25.75 Ab | 32.41 Aa  | 41.90 Aa | 47.54 Aa | 56.74 Aa | 55.66 Aa | 68.82 Aa | 80.52 Aa | 81.51 Aa | 86.68 Aa |
|               | KNO <sub>3</sub>  | 13.55 Bb | 19.80 Cbc | 25.73 Cc | 31.02 Cb | 34.17 Cb | 39.50 Cc | 43.21 Cc | 48.48 Cc | 51.72 Cb | 58.02 Bb |
|               | WN                | 16.11 Bb | 26.61 Bb  | 36.04 Bb | 41.90 Bb | 45.75 Ba | 49.31 Ba | 54.47 Bc | 55.40 Ba | 62.14 Ba | 60.44 Ba |
| Blue          | NaNO <sub>3</sub> | 31.28 Aa | 34.12 Aa  | 37.00 Ab | 39.65 Bb | 45.80 Ac | 40.58 Cc | 49.73 Bb | 52.33 Bc | 60.97 Ac | 61.91 Ac |
|               | KNO <sub>3</sub>  | 24.55 Ba | 31.28 Aa  | 34.92 Aa | 39.28 Ba | 45.65 Aa | 47.58 Bb | 49.89 Bb | 56.52 Ab | 54.09 Bb | 60.93 Bb |
|               | WN                | 26.97 Ba | 33.26 Aa  | 39.82 Aa | 46.16 Aa | 50.03 Aa | 51.15 Aa | 57.45 Ac | 48.51 Cb | 61.53 Aa | 59.93 Ba |
| Yellow        | NaNO <sub>3</sub> | 11.54 Ad | 16.55 Cc  | 23.94 Bc | 26.36 Cc | 30.90 Bd | 32.70 Cd | 39.92 Bc | 39.15 Cd | 48.67 Cd | 53.02 Bd |
|               | KNO <sub>3</sub>  | 13.63 Ab | 22.53 Bb  | 32.44 Ab | 38.29 Ba | 48.42 Aa | 51.70 Aa | 56.02 Aa | 67.97 Aa | 75.39 Aa | 76.62 Aa |
|               | WN                | 13.65 Ac | 26.29 Ab  | 33.84 Ab | 39.78 Ac | 46.24 Aa | 51.03 Ba | 59.49 Ab | 56.86 Ba | 55.39 Bb | 53.43 Bb |
