# Supplementary material for: Optimal Laboratory Cultivation Conditions of Limnospira maxima for Large-Scale Production
Source: MDPI journal article supplement (doi:10.3390/biology12121462), 2023-11-24
Supplement: s1 [file s1]

**Supplementary Table S6.** Effect of light spectra and nitrogen source on allophycocyanin concentration of *Limnospira maxima* grown in white, red, blue, and yellow light spectra, supplemented with NaNO<sub>3</sub>, KNO<sub>3</sub>, plus control (WN). Values followed by capital letters denote significant effects between N sources in the same light spectra, and small letters denote significance between light spectra in the same nitrogen source. All values represent means ( $\pm$  SD), followed by SNK statistical test.

| Light spectra | N source          | 0         | 3        | 6         | 9         | 12        | 15        | 18         | 21         | 24        | 27        |
|---------------|-------------------|-----------|----------|-----------|-----------|-----------|-----------|------------|------------|-----------|-----------|
| White         | NaNO <sub>3</sub> | 34.58 Ab  | 57.31 Ab | 71.08 Ab  | 79.40 Bb  | 101.43 Bb | 110.64 Ab | 129.07 Ab  | 128.80 Ab  | 157.19 Ab | 160.40 Ab |
|               | KNO <sub>3</sub>  | 23.13 Bc  | 42.38 Bb | 57.22 Bc  | 66.32 Cb  | 79.81 Cb  | 87.45 Bc  | 101.34 Bc  | 115.80 Ab  | 118.66 Bc | 133.39 Bc |
|               | WN                | 28.73 Bc  | 60.20 Ab | 80.55 Ab  | 94.31 Ab  | 109.84 Ab | 113.44 Ab | 135.12 Ab  | 126.59 Ab  | 118.57 Bc | 110.20 Cc |
| Red           | NaNO <sub>3</sub> | 61.24 Aa  | 77.08 Aa | 99.63 Aa  | 113.05 Aa | 134.93 Aa | 132.36 Aa | 163.66 Aa  | 191.49 Aa  | 193.83 Aa | 206.12 Aa |
|               | KNO <sub>3</sub>  | 33.60 Bb  | 49.10 Cb | 63.81 Cb  | 76.93 Ca  | 84.73 Cb  | 97.95 Bb  | 107.15 Bab | 120.22 Bb  | 128.27 Bb | 143.87 Bb |
|               | WN                | 33.34 Bbc | 55.08 Bb | 74.59 Bb  | 86.72 Bbc | 94.69 Bc  | 102.08 Bc | 112.74 Bc  | 114.68 Bc  | 128.62 Bb | 125.11 Cb |
| Blue          | NaNO <sub>3</sub> | 64.59 Ba  | 70.45 Ba | 76.40 Bb  | 81.86 Bb  | 94.56 Bc  | 83.79 Cc  | 102.67 Bc  | 108.05 Bc  | 125.89 Bd | 127.81 Bc |
|               | KNO <sub>3</sub>  | 50.69 Ca  | 64.58 Ba | 72.09 Ba  | 81.10 Ba  | 94.25 Ba  | 98.23 Bb  | 102.96 Bb  | 116.70 Bb  | 111.67 Cc | 127.81 Bc |
|               | WN                | 74.59 Aa  | 92.00 Aa | 110.14 Aa | 127.67 Aa | 138.36 Aa | 141.48 Aa | 158.90 Aa  | 134.16 Aa  | 170.19 Aa | 165.75 Aa |
| Yellow        | NaNO <sub>3</sub> | 30.03 Ab  | 43.04 Bc | 62.28 Ac  | 68.58 Bc  | 80.39 Bd  | 85.06 Bc  | 103.85 Cc  | 101.85 Cd  | 126.60 Bc | 137.91 Bc |
|               | KNO <sub>3</sub>  | 27.19 Ac  | 44.96 Bb | 64.74 Aab | 76.40 Aa  | 96.61 Aa  | 103.15 Aa | 111.78 Ba  | 135.62 Aa  | 150.43 Aa | 152.88 Aa |
|               | WN                | 28.76 Ac  | 55.41 Ab | 71.32 Ab  | 83.85 Ac  | 97.45 Ac  | 107.54 Ac | 125.37 Ab  | 119.83 Bbc | 116.74 Bc | 112.61 Cc |
