# Supplementary material for: Optimal Laboratory Cultivation Conditions of Limnospira maxima for Large-Scale Production
Source: MDPI journal article supplement (doi:10.3390/biology12121462), 2023-11-24
Supplement: s1 [file s1]

**Supplementary Table S8.** Effect of light spectra and nitrogen source on soluble proteins concentration of *Limnospira maxima* grown in white, red, blue, and yellow light spectra, supplemented with NaNO<sub>3</sub>, KNO<sub>3</sub>, plus control (WN). Values followed by a capital letter denote a significant effect between N source in the same light spectra, and a small letter denotes significance between light spectra in the same nitrogen source. All values represent the mean ( $\pm$  SD), followed by the SNK statistical test.

| Light spectra | N source          | 0        | 3        | 6        | 9         | 12        | 15        | 18        | 21        | 24        | 27        |
|---------------|-------------------|----------|----------|----------|-----------|-----------|-----------|-----------|-----------|-----------|-----------|
| White         | NaNO <sub>3</sub> | 26.45 Ab | 43.87 Ba | 54.36 Ba | 60.72 Ba  | 77.57 Ba  | 84.62 Ba  | 98.71 Ba  | 98.50 Ba  | 120.22 Aa | 122.67 Aa |
|               | KNO <sub>3</sub>  | 17.47 Bb | 32.01 Cb | 43.22 Cb | 50.10 Cb  | 60.28 Cb  | 66.05 Cb  | 76.54 Cb  | 87.46 Cb  | 89.62 Bb  | 100.75 Cb |
|               | WN                | 28.44 Ab | 59.58 Ab | 79.73 Ab | 93.35 Ab  | 108.72 Ab | 112.29 Ab | 133.74 Ab | 125.30 Ab | 117.36 Ab | 109.07 Bb |
| Red           | NaNO <sub>3</sub> | 31.06 Ab | 39.09 Aa | 50.52 Aa | 57.33 Aa  | 68.42 Ab  | 67.12 Ab  | 83.00 Ab  | 97.11 Aa  | 98.30 Ab  | 104.53 Ab |
|               | KNO <sub>3</sub>  | 22.32 Ba | 32.62 Bb | 42.39 Bb | 51.11 Ab  | 56.29 Bc  | 65.08 Ab  | 71.19 Bc  | 79.87 Bc  | 85.22 Bb  | 95.58 Bb  |
|               | WN                | 21.30 Bc | 35.19 Bd | 47.65 Ac | 55.40 Ac  | 60.49 Bc  | 65.20 Ac  | 72.02 Bc  | 73.25 Bc  | 82.16 Bc  | 79.91 Cc  |
| Blue          | NaNO <sub>3</sub> | 36.38 Aa | 39.68 Aa | 43.03 Bb | 46.11 Bb  | 53.26 Bc  | 47.19 Cc  | 57.83 Bc  | 60.86 Bc  | 70.90 Ac  | 71.99 Ac  |
|               | KNO <sub>3</sub>  | 28.55 Ba | 36.37 Ab | 40.60 Bb | 45.68 Bc  | 53.09 Bc  | 55.32 Bc  | 57.99 Bd  | 65.73 Ad  | 62.89 Cc  | 72.03 Ac  |
|               | WN                | 33.92 Ab | 41.84 Ac | 50.09 Ac | 58.06 Ac  | 62.93 Ac  | 64.34 Ac  | 72.26 Ac  | 61.01 Bd  | 77.40 Ad  | 75.38 Ac  |
| Yellow        | NaNO <sub>3</sub> | 23.52 Bb | 33.72 Cb | 48.79 Ca | 53.72 Cb  | 62.97 Cb  | 66.64 Cb  | 81.35 Cb  | 79.79 Cb  | 99.17 Cb  | 108.04 Cb |
|               | KNO <sub>3</sub>  | 25.30 Ba | 41.83 Ba | 60.23 Ba | 71.09 Ba  | 89.89 Ba  | 95.98 Ba  | 104.01 Ba | 126.19 Ba | 139.97 Ba | 142.24 Ba |
|               | WN                | 39.04 Aa | 75.22 Aa | 96.81 Aa | 113.82 Aa | 132.29 Aa | 145.98 Aa | 170.18 Aa | 162.67 Aa | 158.46 Aa | 152.86 Aa |
